# Supplementary material
Source: PubMed Central journal article supplement (PMC3318756)

Figure S1

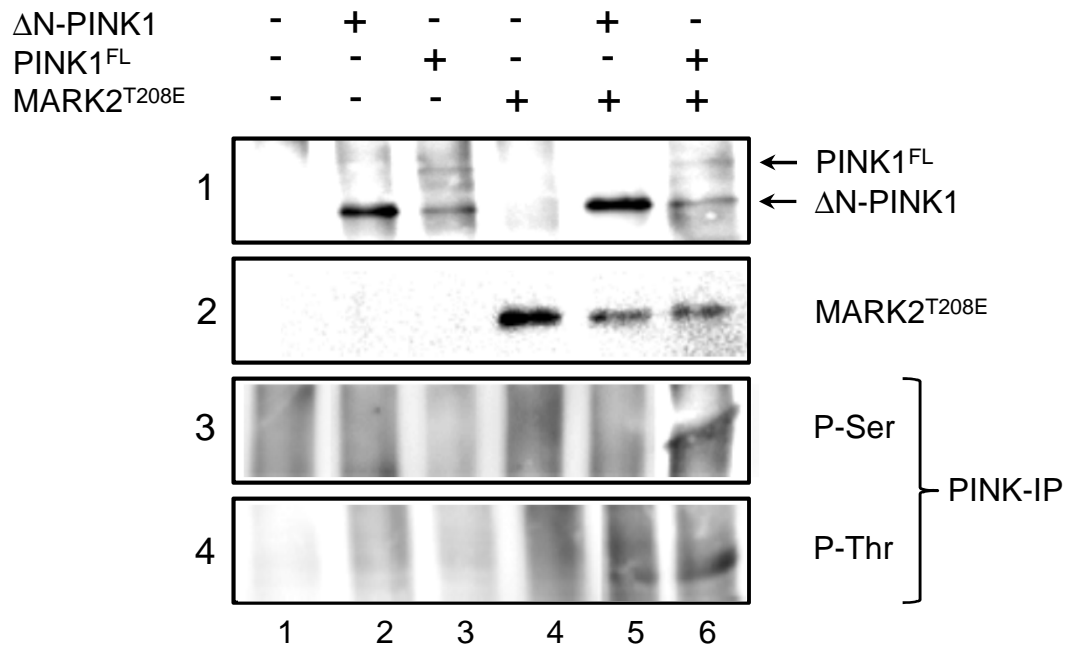

Figure S2

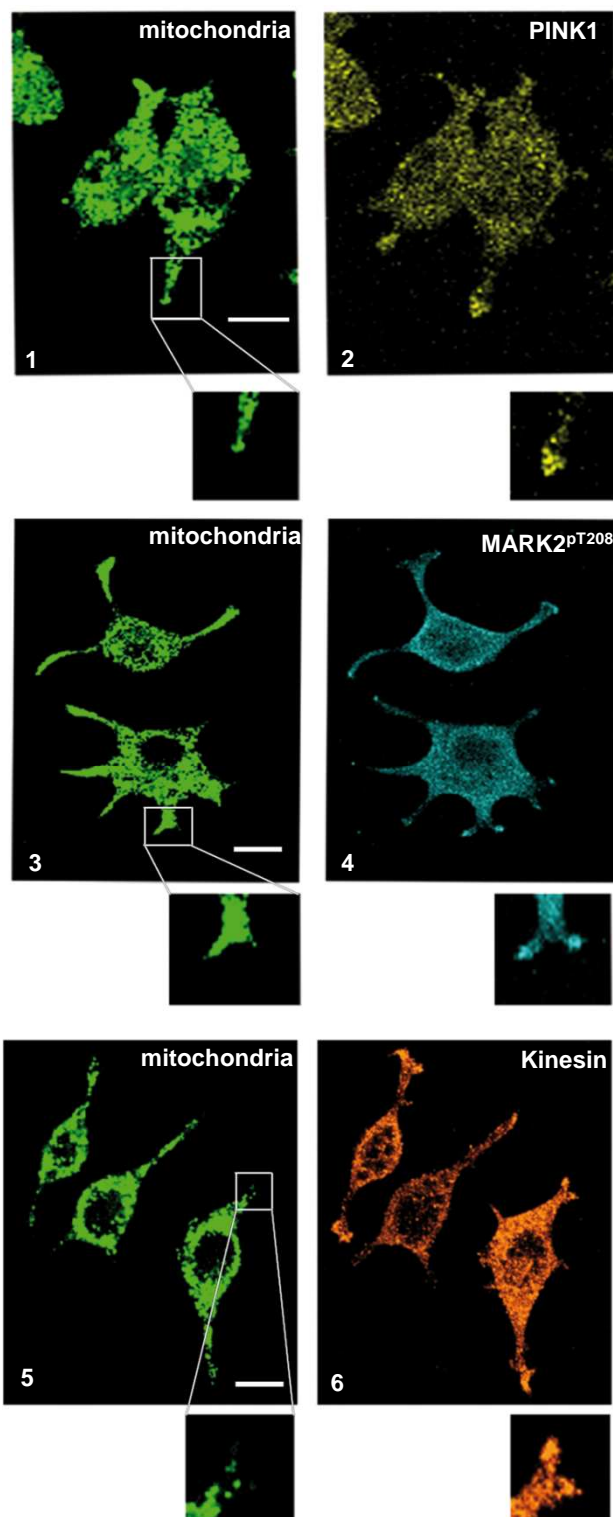

Supplement: supp_M111.262287_jbc.M111.262287-2.pdf [file supp_M111.262287_jbc.M111.262287-2.pdf]
